# Supplementary material for: Assessment of near-infrared fluorophores to study the biodistribution and tumor targeting of an IL13 receptor α2 antibody by fluorescence molecular tomography
Source: PubMed Central journal article supplement (PMC5593638; doi:10.18632/oncotarget.19569), 2017-07-26
Supplement: oncotarget-08-57231-s001.pdf [file oncotarget-08-57231-s001.pdf]

# Assessment of near-infrared fluorophores to study the biodistribution and tumor targeting of an IL13 receptor $\alpha 2$ antibody by fluorescence molecular tomography

## SUPPLEMENTARY MATERIALS

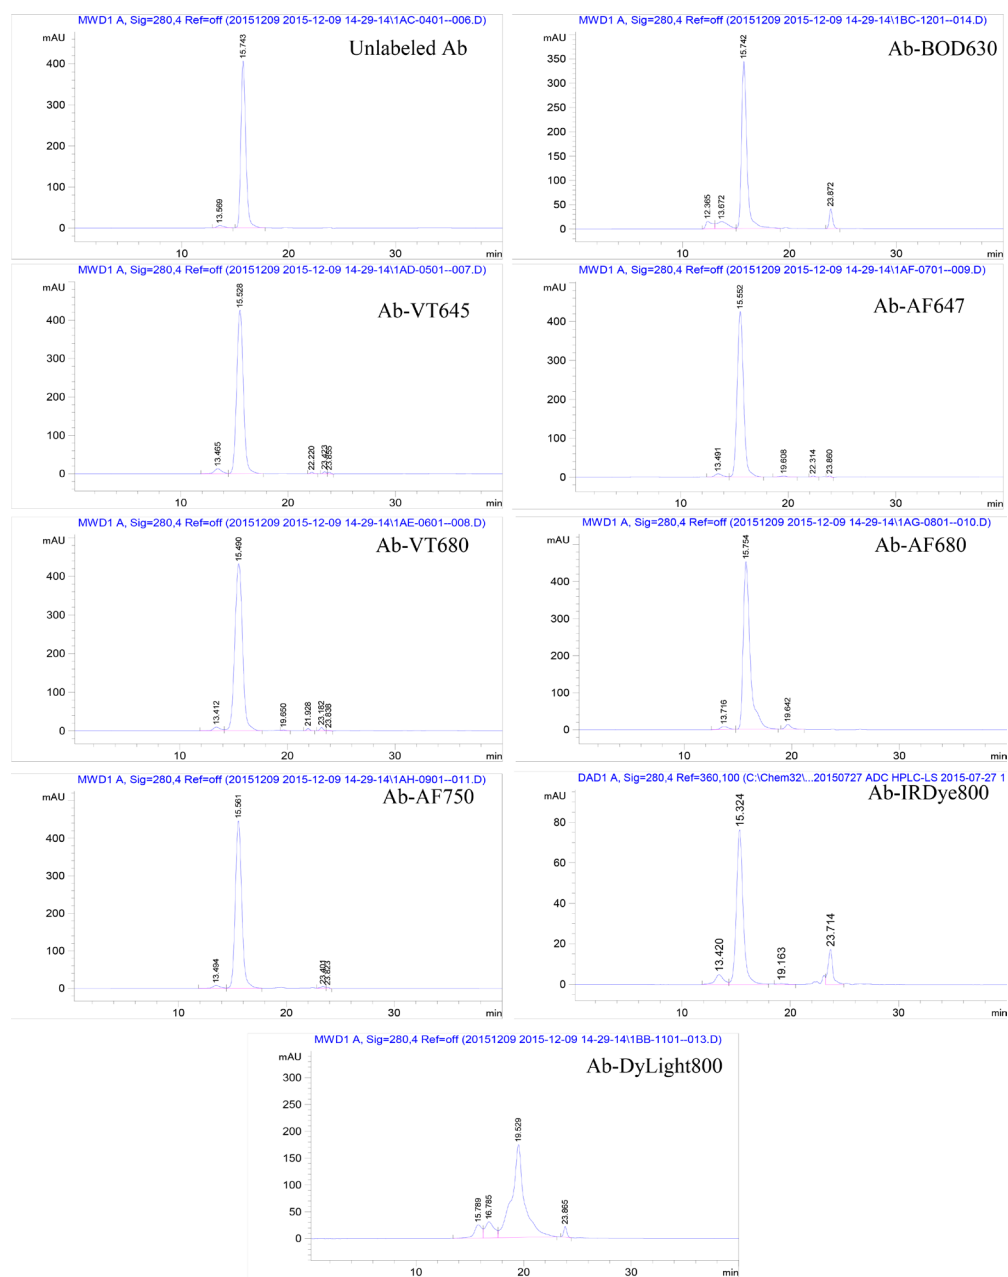

**Supplementary Figure 1: SEC-HPLC chromatograms for each Ab-F conjugate.** The figure shows SEC-HPLC chromatograms for the unlabeled Ab and each of the Ab-F conjugates with absorption units (mAU) on the y-axis and retention time (minutes) on the x-axis. The RT of the major peak was used to assess the stability and purity of the Ab-F conjugates. All the Ab-Fs, except Ab-DyLight800 showed similar profiles for the major peak.

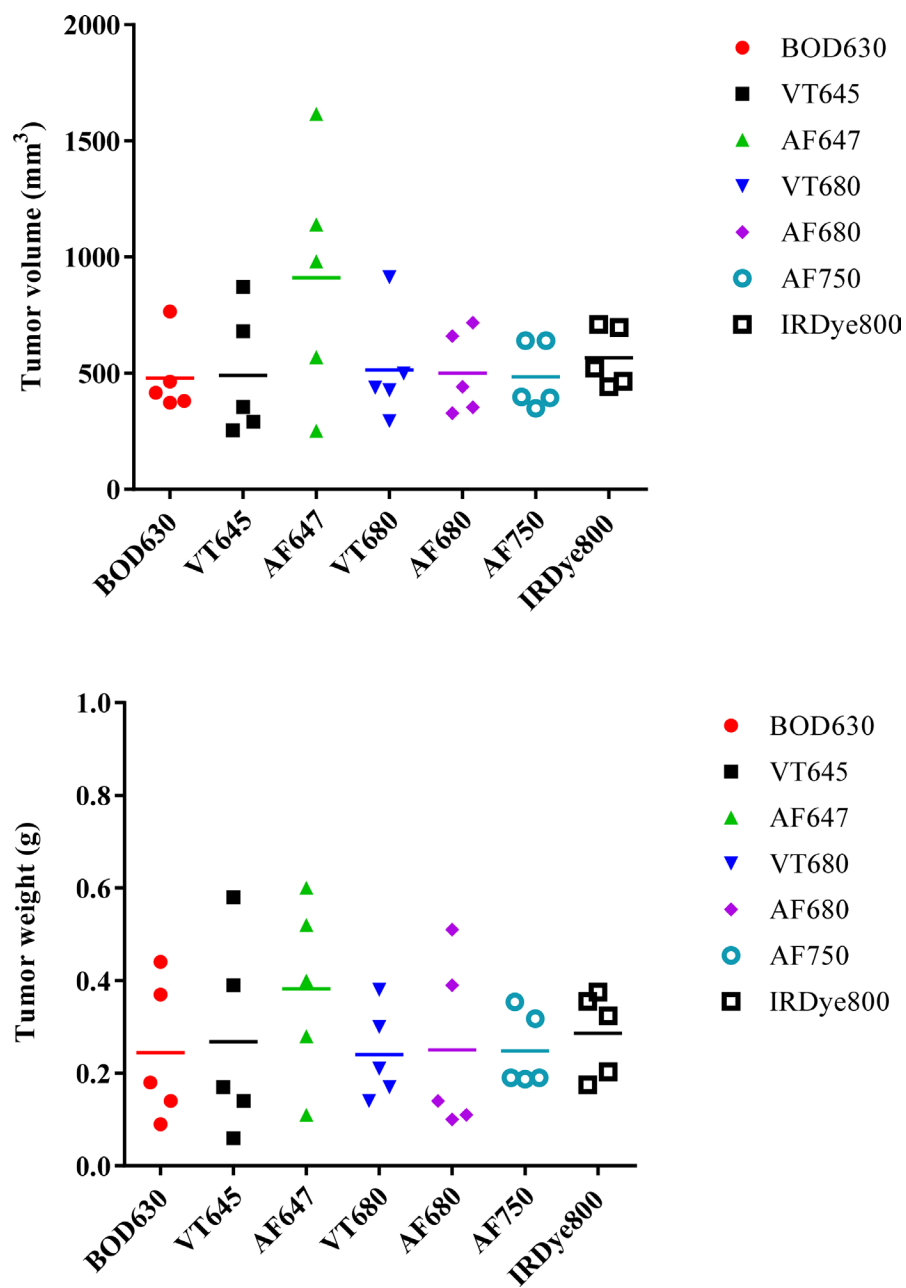

**Supplementary Figure 2:** Tumor volume (A) and Weights (B) of various groups at 96 h post-injection.

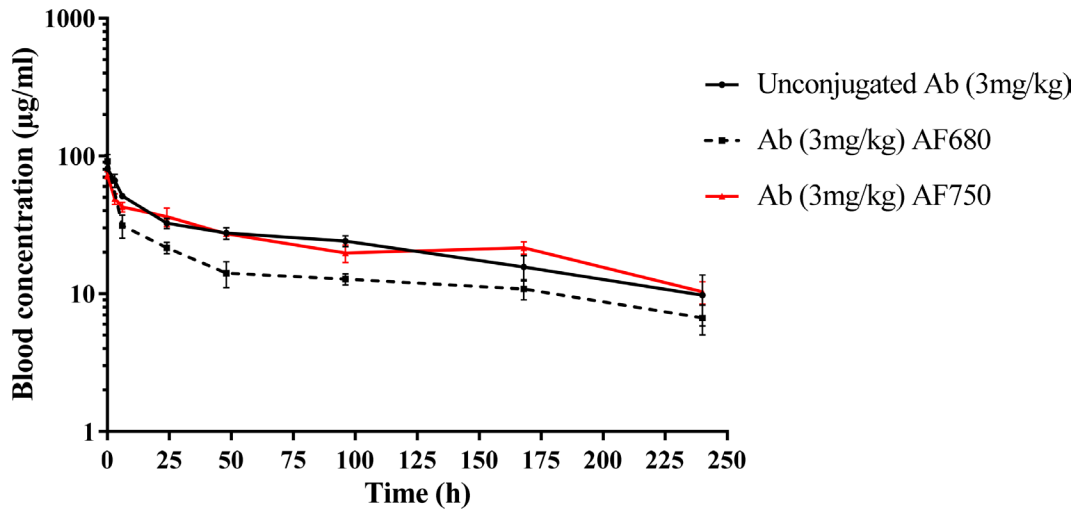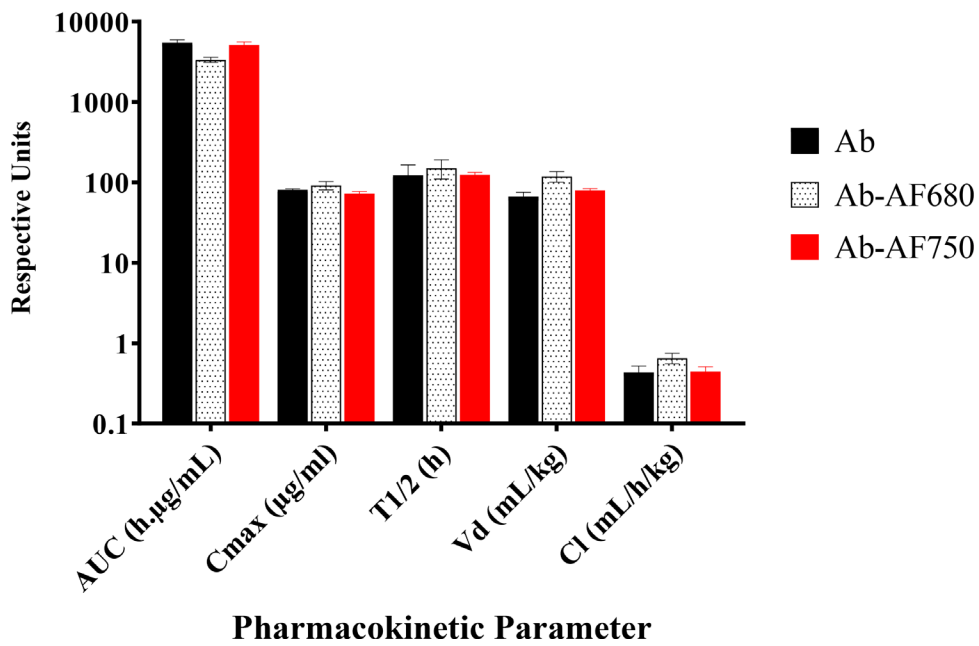

**Supplementary Figure 3: Comparison of blood concentration time-profile and PK parameters for unlabeled-Ab, Ab-AF680 and Ab-750.** Ab concentrations were measured by LBA assay. PK parameters were similar between unlabeled-Ab, Ab-AF680 and Ab-750.

**Supplementary Table 1: Ab Retention in different organs**

| Fluorophore     | % ID/g |         |        |         |           |         |         |           |
|-----------------|--------|---------|--------|---------|-----------|---------|---------|-----------|
|                 | Tumor  | Liver   | Spleen | Lung    | Kidney    | Eyes    | Heart   | Brain     |
| <b>BOD630</b>   | 5 ± 1  | 6 ± 0.5 | 11 ± 6 | 3 ± 0.5 | 3 ± 0.4   | 2 ± 0.3 | 1 ± 0.3 | 0.1 ± 0.0 |
| <b>VT645</b>    | 31 ± 3 | 3 ± 0.4 | 5 ± 1  | 10 ± 2  | 5 ± 1     | 16 ± 8  | 4 ± 1   | 2 ± 0.4   |
| <b>AF647</b>    | 23 ± 3 | 3 ± 0.2 | 4 ± 1  | 8 ± 1   | 31 ± 0.5  | 9 ± 2   | 2 ± 0.4 | 2 ± 1     |
| <b>VT680</b>    | 15 ± 3 | 22 ± 2  | 21 ± 2 | 7 ± 2   | 3 ± 1     | 3 ± 1   | 4 ± 2   | 2 ± 1     |
| <b>AF680</b>    | 12 ± 2 | 1 ± 1   | 2 ± 2  | 3 ± 1   | 0.4 ± 0.2 | 1 ± 1   | 1 ± 1   | 0.1 ± 0.0 |
| <b>AF750</b>    | 24 ± 5 | 0       | 0      | 12 ± 4  | 2 ± 1     | 10 ± 3  | 3 ± 1   | 1 ± 0.5   |
| <b>IRDye800</b> | 19 ± 5 | 7 ± 1   | 15 ± 4 | 30 ± 6  | 5 ± 1     | 11 ± 3  | 12 ± 5  | 5 ± 2     |

Ab concentration in organs at 96 h for each Ab-F, as calculated from *ex vivo* FMT data. The torso signal from FMT at 5 min and fresh organ weight were used as total dose for the calculation of % ID/g.
